# Supplementary material
Source: Research Square preprint supplement (doi:10.21203/rs.3.rs-9981104/v1)
Supplement: Supplementary file 1 [file 1c53a83eb8e6f8889ebb5632.docx]

**Supplementary Information**

**Tipping points in gut ecology: a hidden resilience deficit in industrialised microbiomes**
Ogochukwu Ofordile Stercora Biosciences Inc., Delaware, USA

MRC Unit The Gambia at the London School of Hygiene & Tropical Medicine, Banjul, The Gambia

# Supplementary Tables

**Supplementary Table 1 | Genus-level richness by illness status at Day 85**

| **Illness status** | **n** | **Mean** | **SD** | **Median** | **t (df)** | **p** |
| --- | --- | --- | --- | --- | --- | --- |
| Not ill | 137 | 103.06 | 25.28 | 105.0 | 3.531 (208.4) | 0.0005 |
| Ill | 315 | 93.90 | 25.47 | 96.0 |  |  |
| Cohen's d = 0.36. Welch two-sample t-test. Timepoint: Day 85. | | | | | | |

**Supplementary Table 2 | Shannon diversity by illness status at Day 85**

| **Illness status** | **n** | **Mean** | **SD** | **Median** | **t (df)** | **p** |
| --- | --- | --- | --- | --- | --- | --- |
| Not ill | 137 | 2.2509 | 0.4385 | 2.1945 | −0.456 (267.0) | 0.649 |
| Ill | 315 | 2.2715 | 0.4522 | 2.2738 |  |  |
| Cohen's d = 0.046. Note: ill children have marginally higher Shannon (direction reversed). AUC richness = 0.605 (95% CI 0.548–0.662) vs AUC Shannon = 0.521 (0.463–0.578), DeLong p = 0.104. | | | | | | |

**Supplementary Table 3 | Negative binomial models: P. stercorea → ARI frequency (Day 85)**

| **Model** | **n** | **β** | **SE** | **IRR** | **95% CI low** | **95% CI high** | **p** |
| --- | --- | --- | --- | --- | --- | --- | --- |
| Total (no richness adjustment) | 447 | −0.0556 | 0.0182 | 0.9459 | 0.9130 | 0.9806 | 0.002 |
| Direct (richness-adjusted) | 447 | −0.0594 | 0.0194 | 0.9423 | 0.9073 | 0.9791 | 0.002 |
| Covariates: age at enrolment, sex, HAZ. ARI frequency capped at 5 episodes. The near-identical β across total and richness-adjusted models (0.0556 vs 0.0594) confirms richness independence of the P. stercorea–ARI association. | | | | | | | |

**Supplementary Table 4 | Joint species model: P. stercorea and P. copri → ARI frequency (Day 85)**

| **Term** | **n** | **β** | **SE** | **IRR** | **95% CI low** | **95% CI high** | **p** |
| --- | --- | --- | --- | --- | --- | --- | --- |
| P. stercorea (log) | 447 | −0.0507 | 0.0192 | 0.9505 | 0.9159 | 0.9874 | 0.008 |
| P. copri (log) | 447 | −0.0286 | 0.0326 | 0.9718 | 0.9134 | 1.0383 | 0.381 |
| Inter-species correlation r = 0.32 (rules out collinearity). Both species included simultaneously. Covariates: age at enrolment, sex, HAZ. | | | | | | | |

**Supplementary Table 5 | Mediation analysis: proportion of P. stercorea–ARI association mediated by genus-level richness**

| **Outcome** | **Path a (β)** | **Path b (β)** | **NIE** | **Total effect** | **Prop. mediated** | **Sobel p** |
| --- | --- | --- | --- | --- | --- | --- |
| ARI frequency | 2.4277 | 0.001 | 0.0024 | −0.039 | ~0.6% (negative) | n/s |
| Path a: P. stercorea → richness. Path b: richness → ARI frequency (adjusting for P. stercorea). NIE = path a × path b. The near-zero path b confirms richness does not mediate the ARI-protective association; the negative proportion indicates richness acts as a mild suppressor. Covariates: age, sex, HAZ. | | | | | | |

**Supplementary Table 6 | P. stercorea (Day 85) → inflammatory biomarkers (Day 1) stratified by nutritional status**

Exposure: Day 85 P. stercorea abundance (primary microbiome timepoint). Outcome: Day 1 biomarkers (prospective baseline, pre-illness). This design ensures the association is prospective and unconfounded by illness status. Covariates: HAZ at enrolment, age at sampling, sex.

| **Outcome** | **Stratum** | **n** | **β** | **SE** | **95% CI low** | **95% CI high** | **p** |
| --- | --- | --- | --- | --- | --- | --- | --- |
| log CRP | High WAZ (better nourished) | 84 | +0.0641 | 0.0303 | 0.0038 | 0.1245 | 0.037 |
| log CRP | Low WAZ (more malnourished) | 200 | −0.0179 | 0.0192 | −0.0557 | 0.0199 | 0.352 |
| log AGP | High WAZ (better nourished) | 84 | +0.0179 | 0.0064 | 0.0051 | 0.0307 | 0.007 |
| log AGP | Low WAZ (more malnourished) | 200 | −0.0073 | 0.0041 | −0.0154 | 0.0008 | 0.076 |
| WAZ split at median (−1.0); n = 200 Low WAZ, n = 84 High WAZ. Covariates: HAZ, age at sampling, sex. BH q (Family 1, 8 stratum-level tests): High WAZ AGP q = 0.032; High WAZ CRP q = 0.075; Low WAZ null. BH q (Family 2, 4 interaction tests): CRP q = 0.001; AGP q < 0.001. | | | | | | | |

**Supplementary Table 7 | P. stercorea (Day 1) → inflammatory biomarkers (Day 1) stratified by nutritional status**

Both exposure and outcome measured at Day 1 (cross-sectional within this timepoint). Provides insight into baseline immune ecology before the trial intervention window. Covariates: HAZ at enrolment, age at sampling, sex.

| **Outcome** | **Stratum** | **n** | **β** | **SE** | **95% CI low** | **95% CI high** | **p** |
| --- | --- | --- | --- | --- | --- | --- | --- |
| log CRP | High WAZ (better nourished) | 121 | +0.0070 | 0.0252 | −0.0430 | 0.0569 | 0.783 |
| log CRP | Low WAZ (more malnourished) | 276 | −0.0371 | 0.0153 | −0.0672 | −0.0071 | 0.016 |
| log AGP | High WAZ (better nourished) | 121 | +0.0144 | 0.0053 | 0.0039 | 0.0250 | 0.008 |
| log AGP | Low WAZ (more malnourished) | 276 | −0.0035 | 0.0035 | −0.0103 | 0.0033 | 0.311 |
| WAZ split at median (−1.0); n = 276 Low WAZ, n = 121 High WAZ. Covariates: HAZ, age at sampling, sex. BH q (Family 1, 8 stratum-level tests): Low WAZ CRP q = 0.042; High WAZ AGP q = 0.032. BH q (Family 2, 4 interaction tests): CRP q = 0.015; AGP q = 0.002. Directional asymmetry by WAZ stratum supports host immune-metabolic reserve-dependent immune conditioning. | | | | | | | |

**Supplementary Notes (Conceptual Framework)**

Shannon diversity (H′ = −Σ pᵢ log pᵢ) reflects both richness and evenness and is therefore sensitive to redistribution of relative abundances within a fixed taxonomic pool, whereas genus-level richness more directly captures ecological breadth and functional redundancy.

Across IHAT-GUT and spaceflight datasets, Shannon diversity may remain stable or increase despite ecological deterioration, reflecting compositional reorganisation within a constrained set of taxa rather than expansion of functional capacity. Richness therefore provides a more direct proxy for loss of ecological scope and redundancy.

In spaceflight, the gut microbiome behaves as a closed-system ecological perturbation in which environmental microbial inputs are removed and external constraints are increased. Under these conditions, 4/5 astronauts show movement toward a shared in-flight ecological state, with increases in diversity occurring primarily in individuals with lower baseline values, while the highest-diversity individual remains stable.

This pattern is consistent with convergence toward a constrained ecological attractor rather than system-wide diversification, and is transient over the mission trajectory. Importantly, convergence in diversity metrics co-occurs with depletion of immunologically relevant taxa and immune perturbation, indicating that apparent normalisation reflects restriction within a reduced functional state rather than recovery of ecological function.
